# Supplementary material
Source: ML conference proceedings conference paper supplement (https://openreview.net/forum?id=xlKeMuyoZ5)
Supplement: supplementary_material [file attachment]

# Seshat Global History Databank Text Dataset and Benchmark of Large Language Models' History Knowledge

## Dataset links

Dataset Repository (Github) Croissant Metadata (Github)

## Usage

This dataset can be used to benchmark LLMs on their expert level history knowledge.

## License/Responsibility

This dataset is licensed under CC by 4.0. The authors bear all responsibility in case this dataset contains violations of rights.

## Dataset preservation/DOI

Upon acceptance we will publish the dataset on Zenodo with a respective DOI, as to ensure long term preservation of the dataset.

## Loading the dataset

using Python and Pandas:

```
import pandas as pd
main = pd.read_parquet("Neurips_HiST-LLM.parquet")
ref = pd.read_parquet("references.parquet")
```

## Results reproduction

### Model APIs

Model APIs were been queried using the `openai_run_batch.py` and `togetherai_run.py` python scripts.

### Plots and Tables

Plots and Tables can be re-generated by running the `process_res1.py` script first then the other R and gnuplot scripts can be executed

### Dataset metadata

Dataset metadata documented in the `croissant.json` file.

### Model Fingerprints

When model fingerprint are available we created extra columns for each model fingerprint. These columns are named via the following pattern `<model-name>_<model-fingerprint>`.

## Column Descriptions

### **additional**<sub>review</sub>

Boolean This column describes whether datapoints underwent additional expert review. See section 3.2 of the Paper.

### **Q**

The multiple choice question.

### **A**

The expected completion of the prompt.

### **polity old id**

ID for polity according to Seshat ids.

**start year str**

String for when polity started existing (in BCE/CE format).

**end year str**

String for when polity stopped existing (in BCE/CE format).

**start year int**

Int for when polity started existing (in BCE/CE format).

**end year int**

Int for when polity stopped existing (in BCE/CE format).

**name**

Polity name.

**nga**

Natural Geographic Area for Polity.

**category**

Immediate parent category of fact from Seshat codebook.

**root cat**

Root category of fact from Seshat codebook.

**value**

Value of fact in Seshat.

**variable**

Variable of fact in Seshat.

**id**

Request id for openai batch requests.

**region**

World region for fact.

**description**

Description provided by RAs for fact.
